# Supplementary material
Source: publisher figshare collection journal article supplement (https://acs.figshare.com/ndownloader/files/4661566)
Supplement: Supplementary file 1 [file 4661566]

## Supporting Information

### First scale-up: problems and resolutions on the synthesis of WAY-253752, a novel, dual-acting SSRI/5HT<sub>1A</sub> antagonist.

Antonia Nikitenko, Deborah Evrard, Annmarie L. Sabb, Robert L. Vogel, Gary Stack,  
Mairead Young, Melissa Lin, Boyd L. Harrison, and John R. Potoski  
*Wyeth Research, Pearl River, NY*

#### Table of Contents

|                                                               |     |
|---------------------------------------------------------------|-----|
| General Experimental Methods.....                             | S-1 |
| Compounds <b>4, 11</b> NMR .....                              | S-2 |
| Compounds <b>14, 16</b> . NMR .....                           | S-3 |
| Compounds <b>17, 1</b> NMR .....                              | S-4 |
| Chiral resolution of the acid 11: salts screening tables..... | S-5 |

#### General Experimental Methods

<sup>1</sup>H NMR spectra were recorded at 300 MHz in CDCl<sub>3</sub> (compounds 4, 11) and DMSO-d<sub>6</sub> (compounds 14, 16, 17, 1) using tetramethylsilane as a standard. Chiral HPLC analysis was performed on HP 1100-6 liquid chromatograph equipped with a Welch O1 RR 4.6 x 250 mm column. Mobile phase composition: 60% heptane containing 0.02% TFA, 40% isopropyl alcohol, flow rate 1 mL/min.

#### NMR Spectra

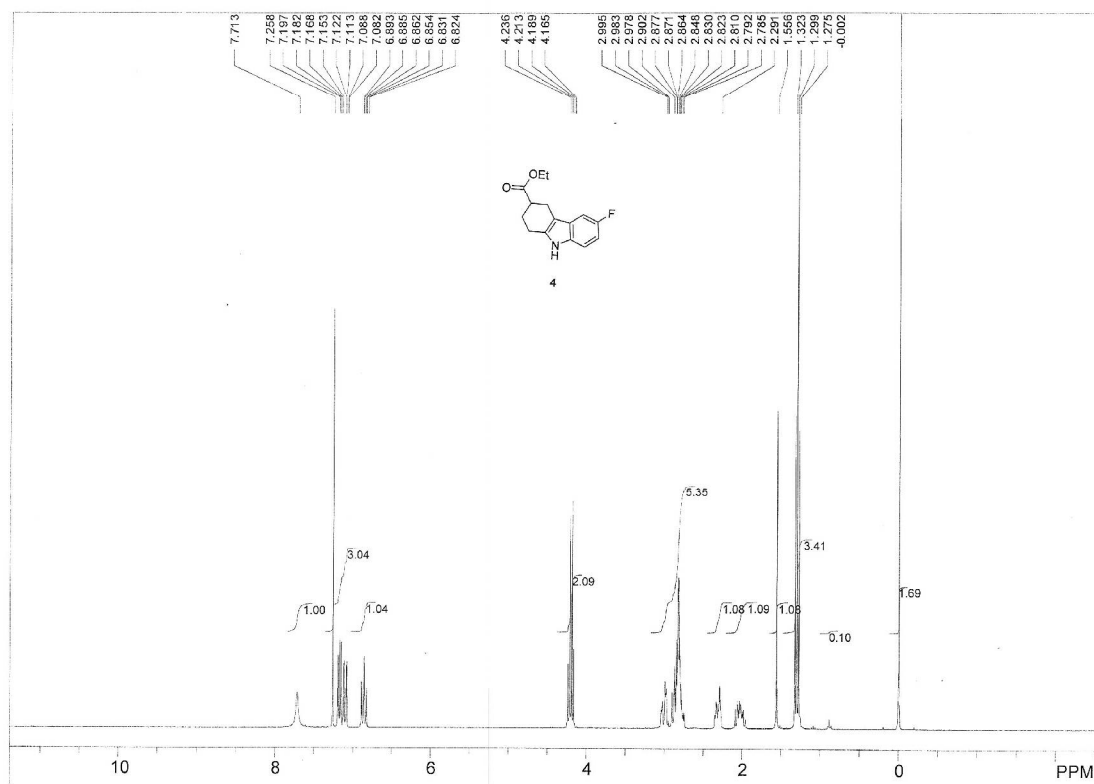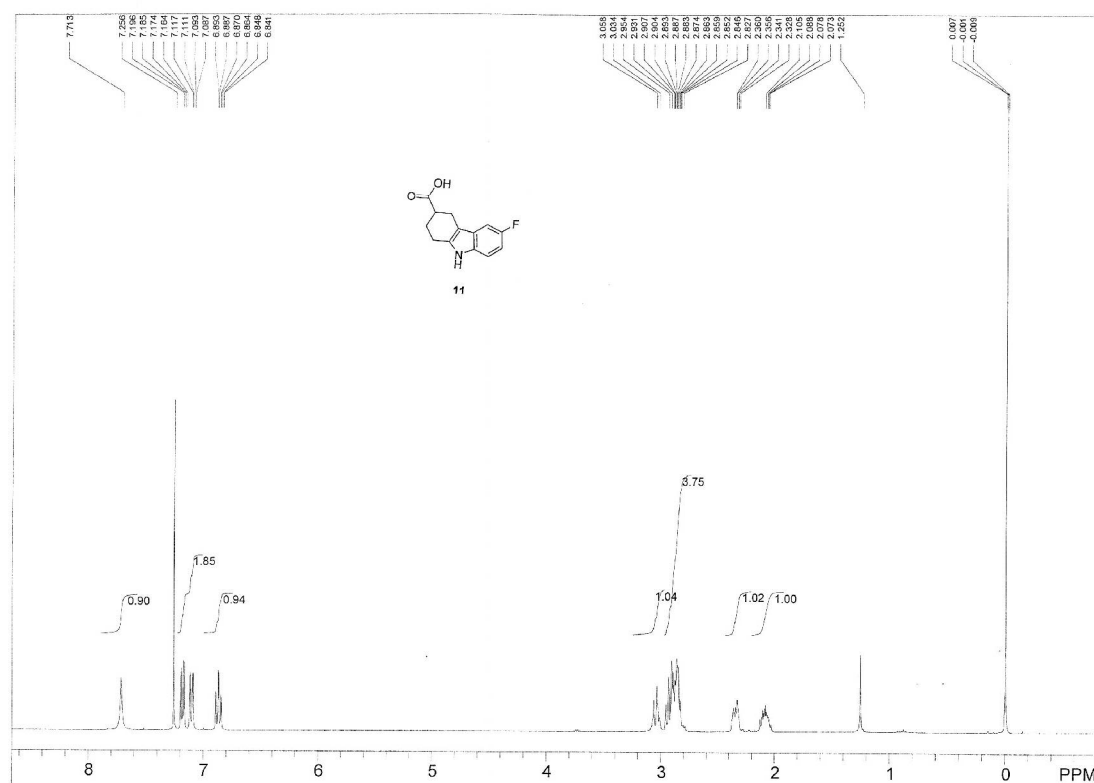

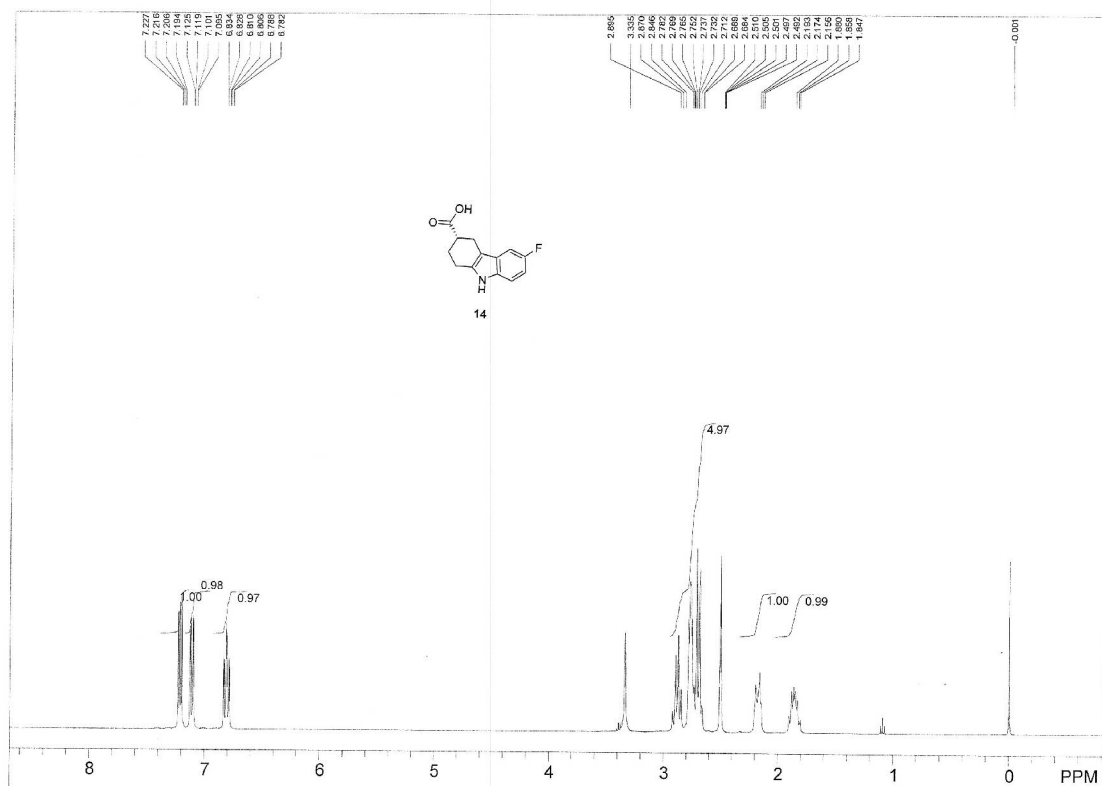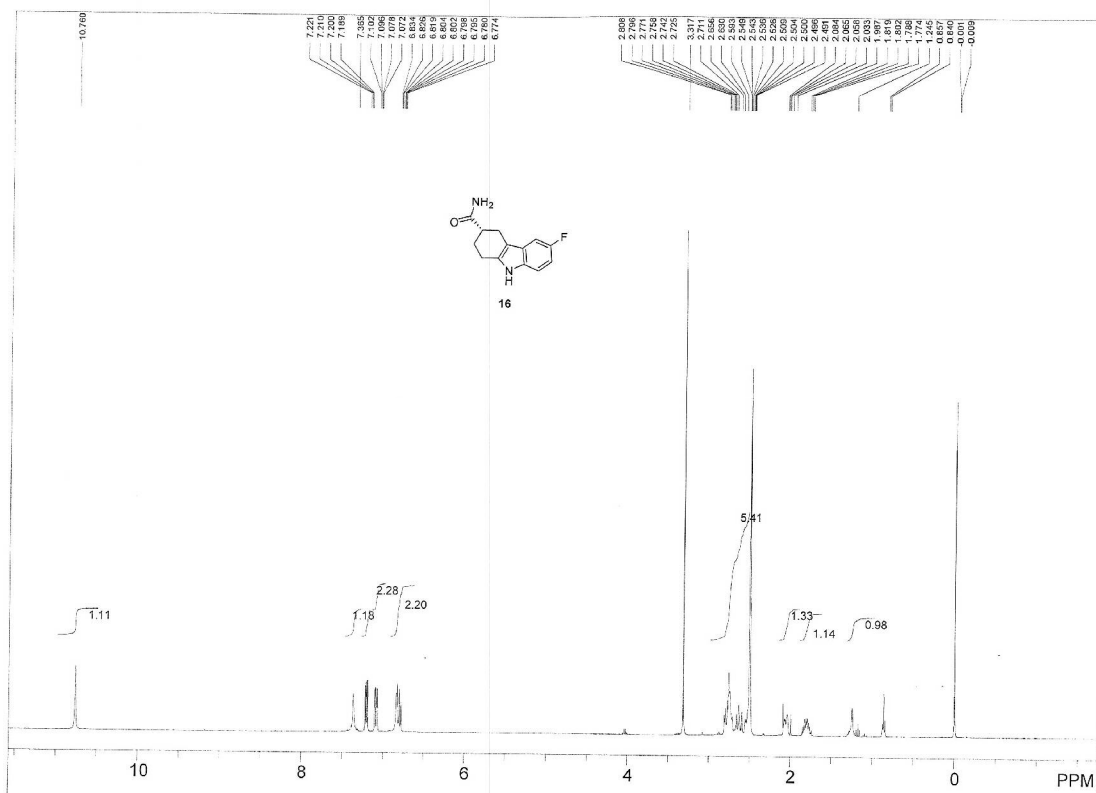

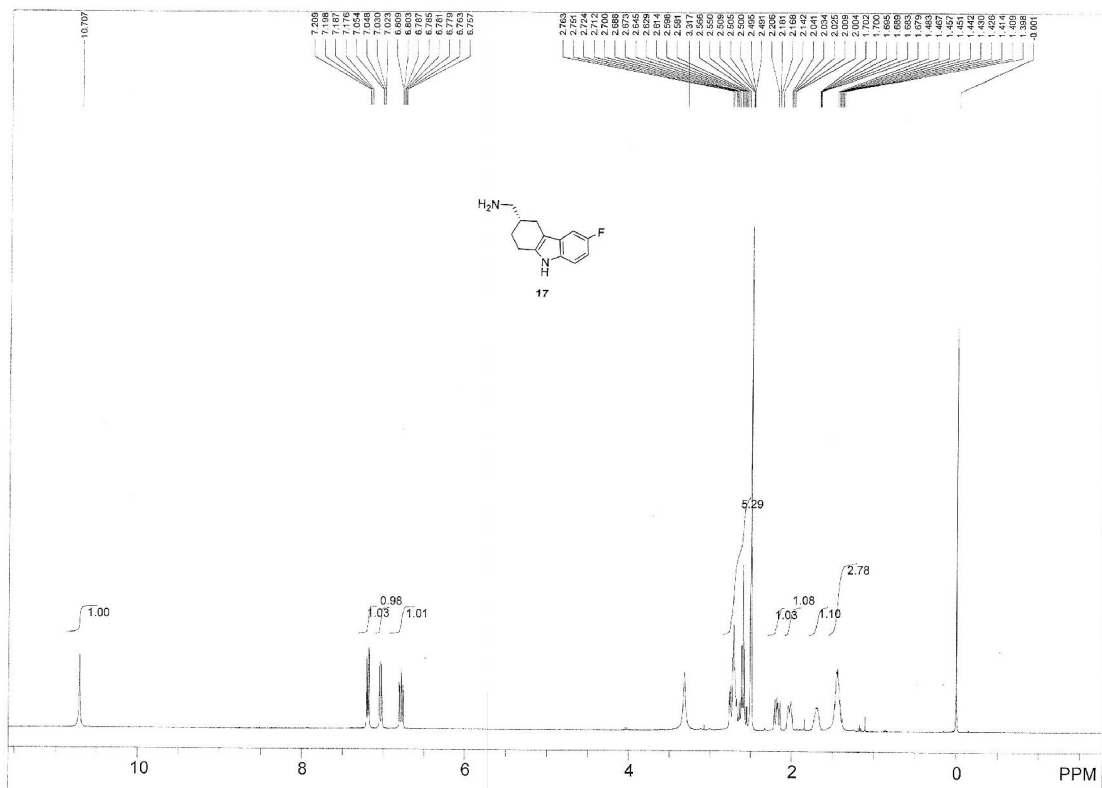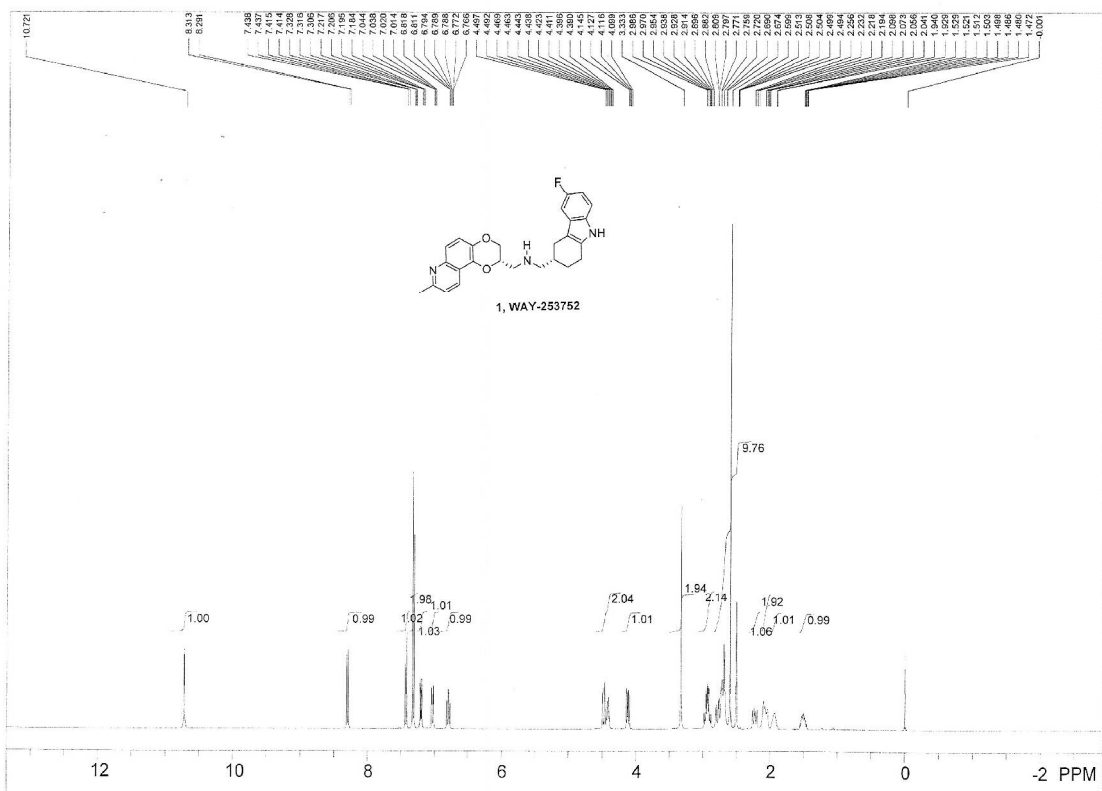

### First resolution of the racemic acid 11

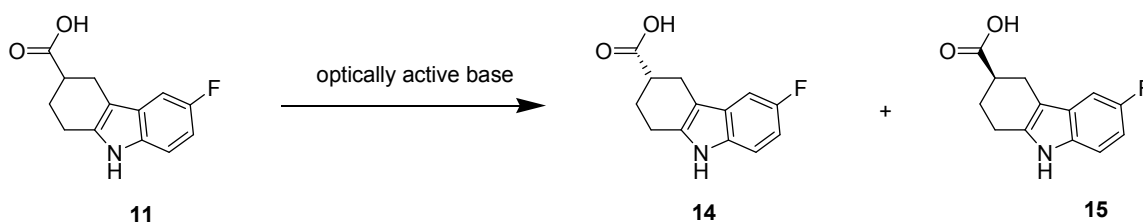

**0.1M Solutions of the racemic acid, 8, and the optically active bases in acetonitrile were made, mixed up in 1:1 ratio, and left in open vials.**

| Base                       | Results                                                                                 |
|----------------------------|-----------------------------------------------------------------------------------------|
| (-)-ψ-ephedrine            | No crystals                                                                             |
| (+)-dehydroabietyl amine   | Fast precipitation, amorphous                                                           |
| D-(+)-2-aminobutanol       | No crystals                                                                             |
| (-)-N-benzylphenethylamine | No crystals                                                                             |
| (-)-Cinchonidine           | Slow crystallization, <b>14/15</b> ratio 2:98<br>Mother liquor <b>14/15</b> ratio 80:20 |

### Second resolution of the acid, enriched with the right enantiomer

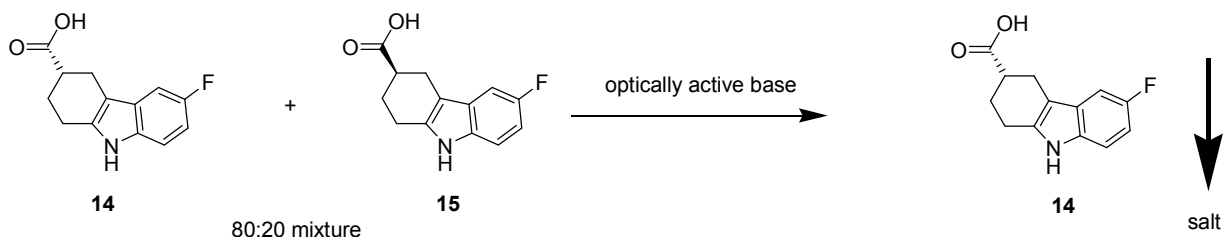

| Base                   | Results                     | S:R ratio in the salt |
|------------------------|-----------------------------|-----------------------|
| (+)-ephedrine          | No crystals                 |                       |
| (-)-ephedrine          | Crystals, forming slowly    | 80:20                 |
| (+)-norephedrine       | No crystals                 |                       |
| (+)-pseudoephedrine    | Crystals, forming slowly    | 98:2                  |
| (+)-naphthylethylamine | Crystals, forming very fast | 80:20                 |
| (-)-naphthylethylamine | Crystals, forming very fast | 80:20                 |
| (-)-methylbenzylamine  | Crystals, forming slowly    | 80:20                 |
